# Supplementary material for: Reactions of palladium and gold complexes with zinc-thiolate chelates using electrospray mass spectrometry and X-ray diffraction: molecular identification of [Pd(bme-dach)], [Au(bme-dach]+ and [ZnCl(bme-dach)]2Pd
Source: Royal Society of Chemistry journal article supplement (doi:10.1039/b917748p), 2009-01-01
Supplement: b917748p.pdf [file b917748p.pdf]

## Supplementary material

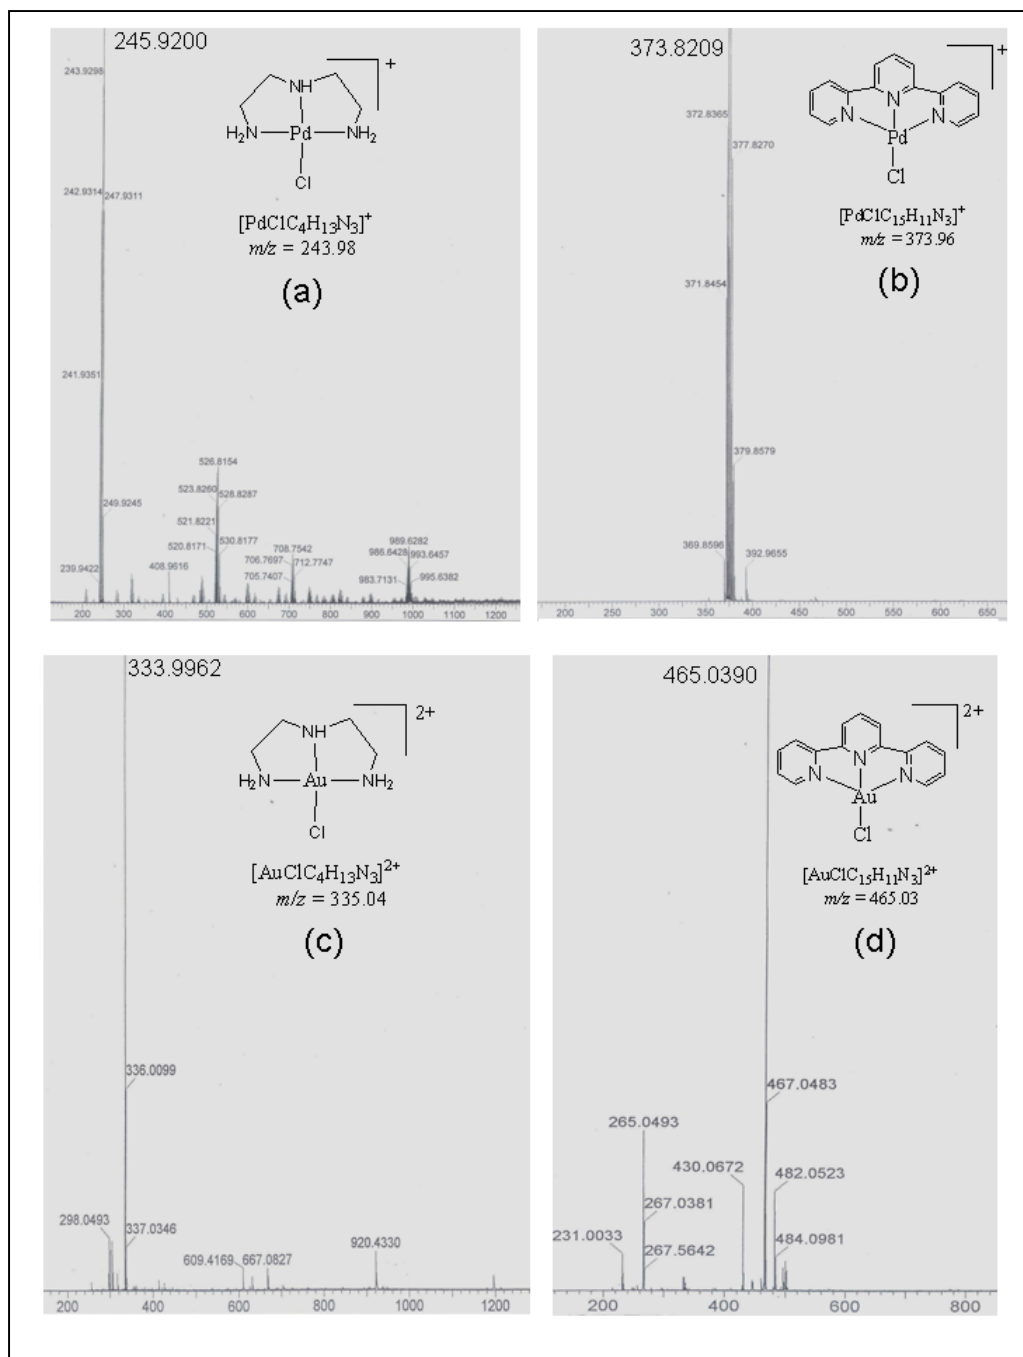

**Figure S1:** The ESI-MS full scan (positive mode) for the Pd(II) and Au(III) starting materials. (a)  $[PdCl(dien)]Cl$  compound; (b)  $[PdCl(terpy)]Cl$ ; (c)  $[AuCl(dien)]Cl_2$ , and (d)  $[AuCl(terpy)]Cl_2$ .

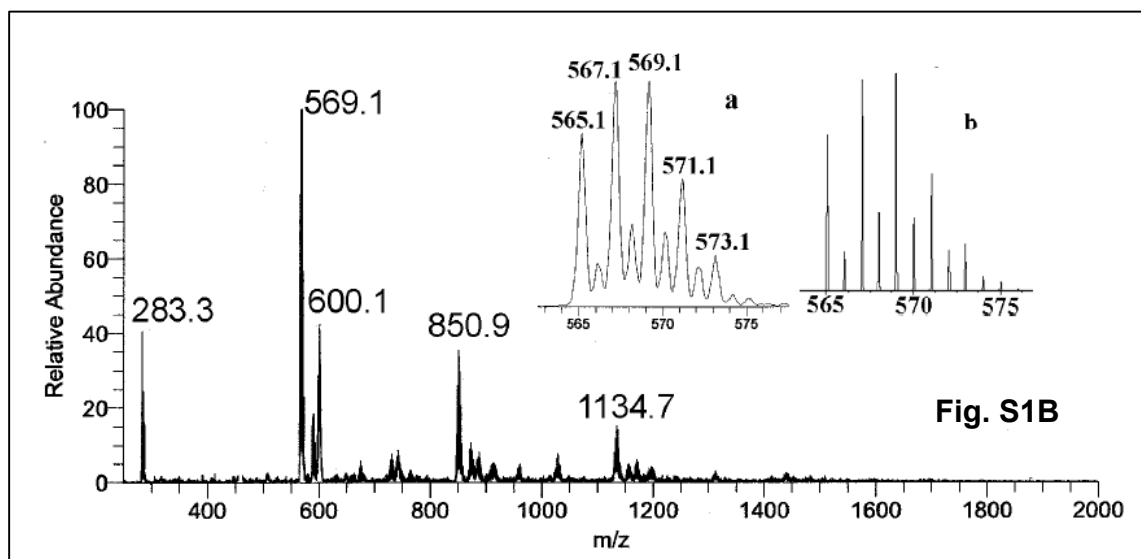

**Figure S2:** The ESI-MS full scan (positive mode) of zinc finger model compound  $[\text{Zn}(\text{bme-dach})]_2$  and the isotopic distribution of  $\{[\text{Zn}(\text{bme-dach})]_2\}^+$  (a) experimental and (b) calculated results. Assignments:  $m/z = 569.1$  corresponds to  $\{[\text{Zn}(\text{bme-dach})]_2/\text{H}^+\}^+$ ,  $m/z = 850.9$  corresponds to  $\{[\text{Zn}(\text{bme-dach})]_3\}^+$ , and  $m/z = 1134.7$  corresponds to  $\{[\text{Zn}(\text{bme-dach})]_4\}^+$ .

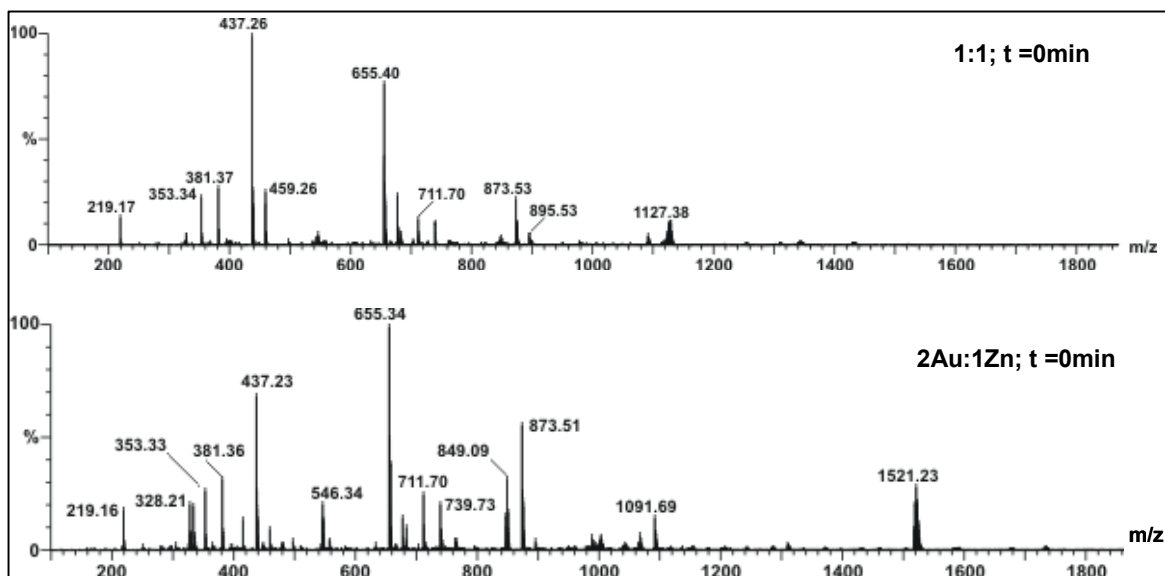

**Figure S3.** The ESI-MS full scan (positive mode) of the reaction between  $[\text{AuCl}(\text{dien})]\text{Cl}_2$  and  $[\text{Zn}(\text{bme-dach})]_2$  after immediately incubation at  $37^\circ$ .

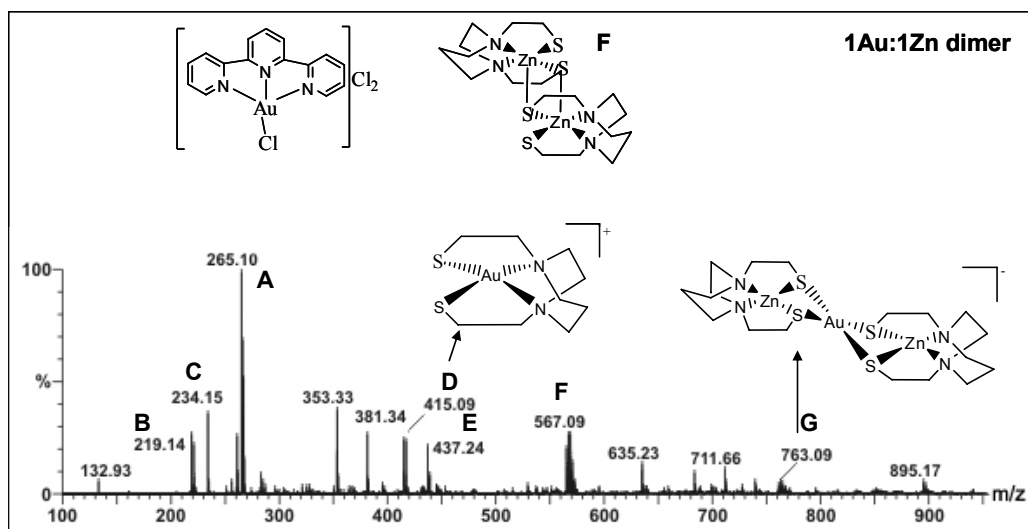

**Figure S4:** The ESI-MS full scan (positive mode) of the reaction between  $[\text{AuCl}(\text{terpy})]\text{Cl}_2$  and  $[\text{Zn}(\text{bme-dach})]_2$  after 5 min of the reaction.

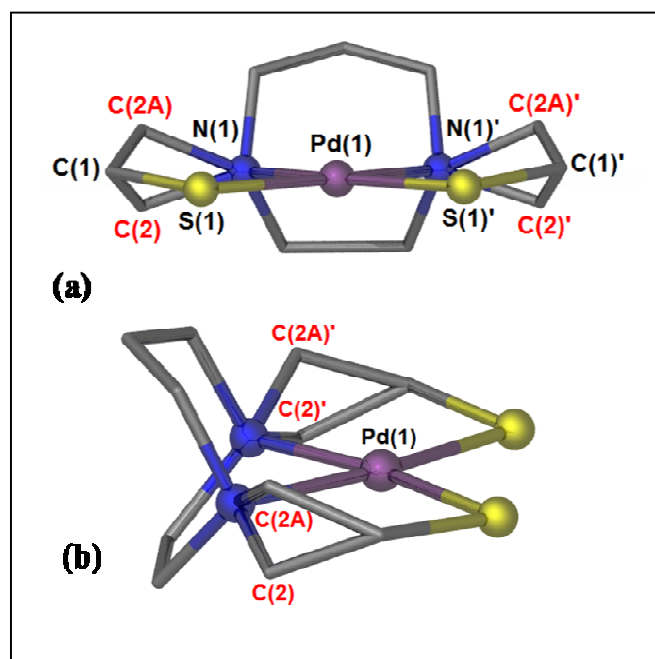

**Figure S5.** Ball and stick images of the  $[\text{Pd}(\text{bme-dach})]$  structural disorder at C(2) (Occ = 0.69355) and C(2A) (Occ = 0.30645), labeled in red. (a) end-on view and (b) side view.
